# Supplementary material for: Synergistic Activity of Colistin Combined With Auranofin Against Colistin-Resistant Gram-Negative Bacteria
Source: PubMed Central journal article supplement (PMC8267823; doi:10.3389/fmicb.2021.676414), 2021-06-25
Supplement: Image_1.pdf [file Image_1.pdf]

## Supplemental materials

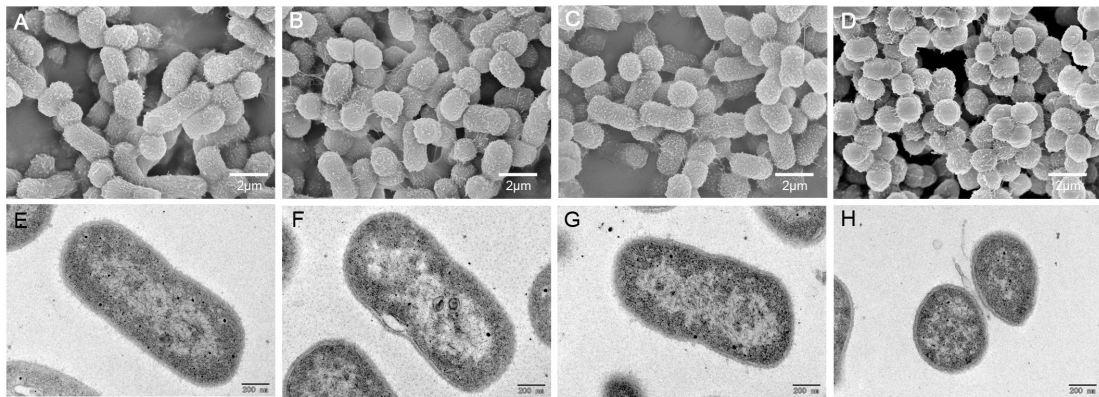

**Supplemental Figure 1** SEM and TEM images of high-level Col-R *A. baumannii* 13660 after treatment with 2 mg/L colistin alone (B, F), 4 mg/L auranofin alone (C, G) or combination (D, H) for 2 h. A and E represent the control condition.
